# Supplementary material for: Baseline Quality of Life of Physical Function Is Highly Relevant for Overall Survival in Advanced Rectal Cancer
Source: MDPI journal article supplement (doi:10.3390/healthcare10010141), 2022-01-12
Supplement: s1 [file s1]

## **Supplementary “Patients and Methods”**

Links to the different questionnaires and the manual:

Link to the English version of the QLQ-C30:

<https://www.eortc.org/app/uploads/sites/2/2018/08/Specimen-QLQ-C30-English.pdf>

Link to the English version of the QLQ-CR38:

<https://qol.eortc.org/?s=qlq-cr38>

Link to the questionnaires and the user agreement

<https://qol.eortc.org/questionnaires/>

Link to the manual for the use and evaluation of the EORTC questionnaires

<https://www.eortc.org/app/uploads/sites/2/2018/02/SCmanual.pdf>

The links were deposited on 30.12.2021.

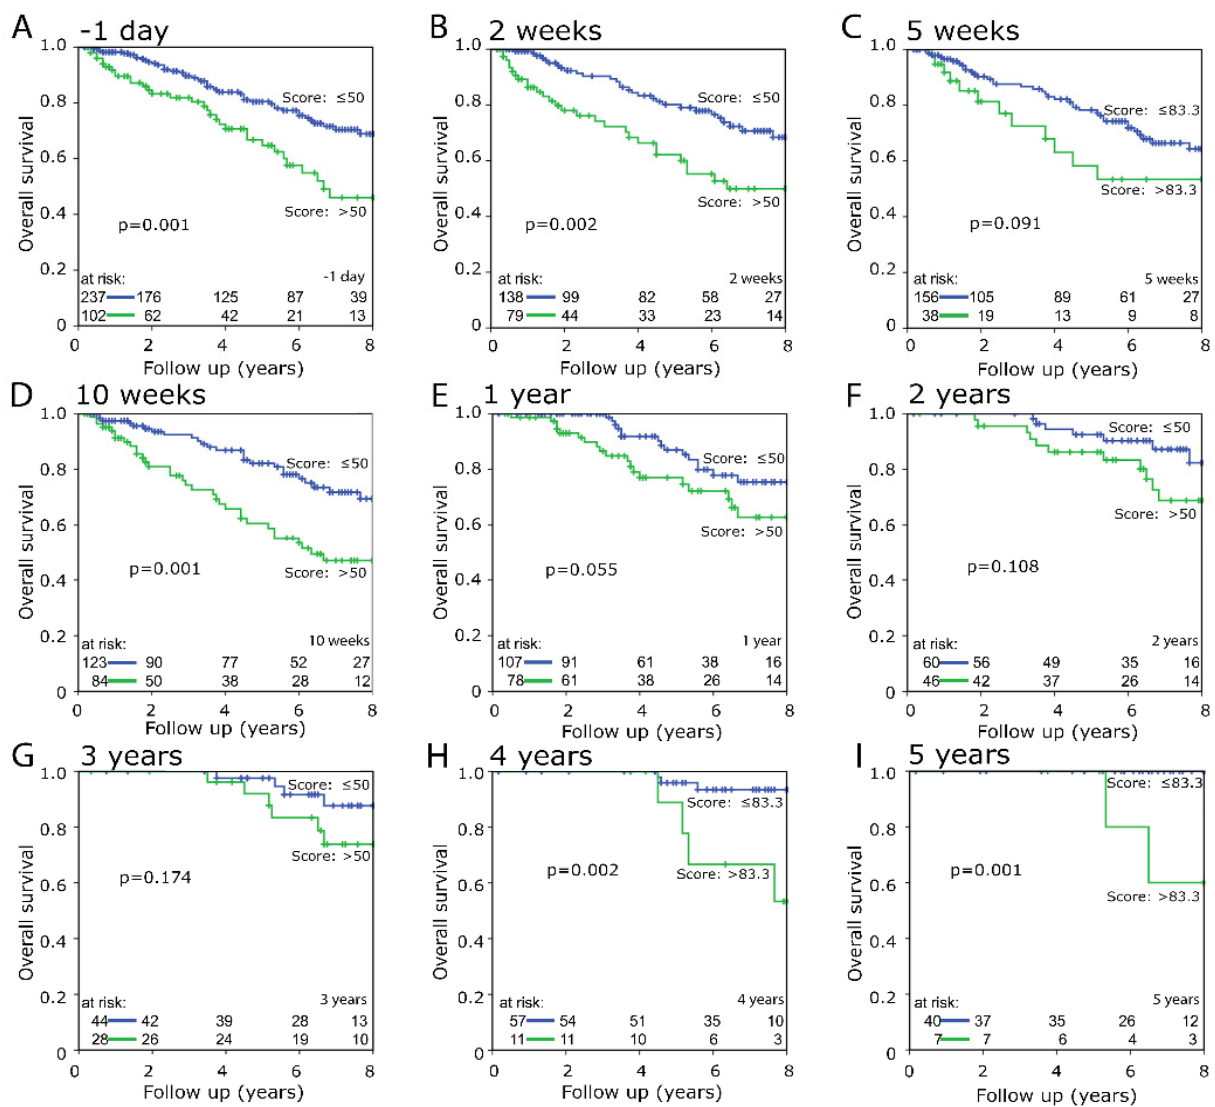

**Supplement Figure S1:** Overall survival between the group with higher (green line) and lower (blue line) scoring “strenuous activities” with respective cutoff values at the different dates (A: day -1, B: week 2, C: week 5, D: week 10, E: 1 year, F: 2 year, G: 3 year, H: 4 year, I: 5 year).

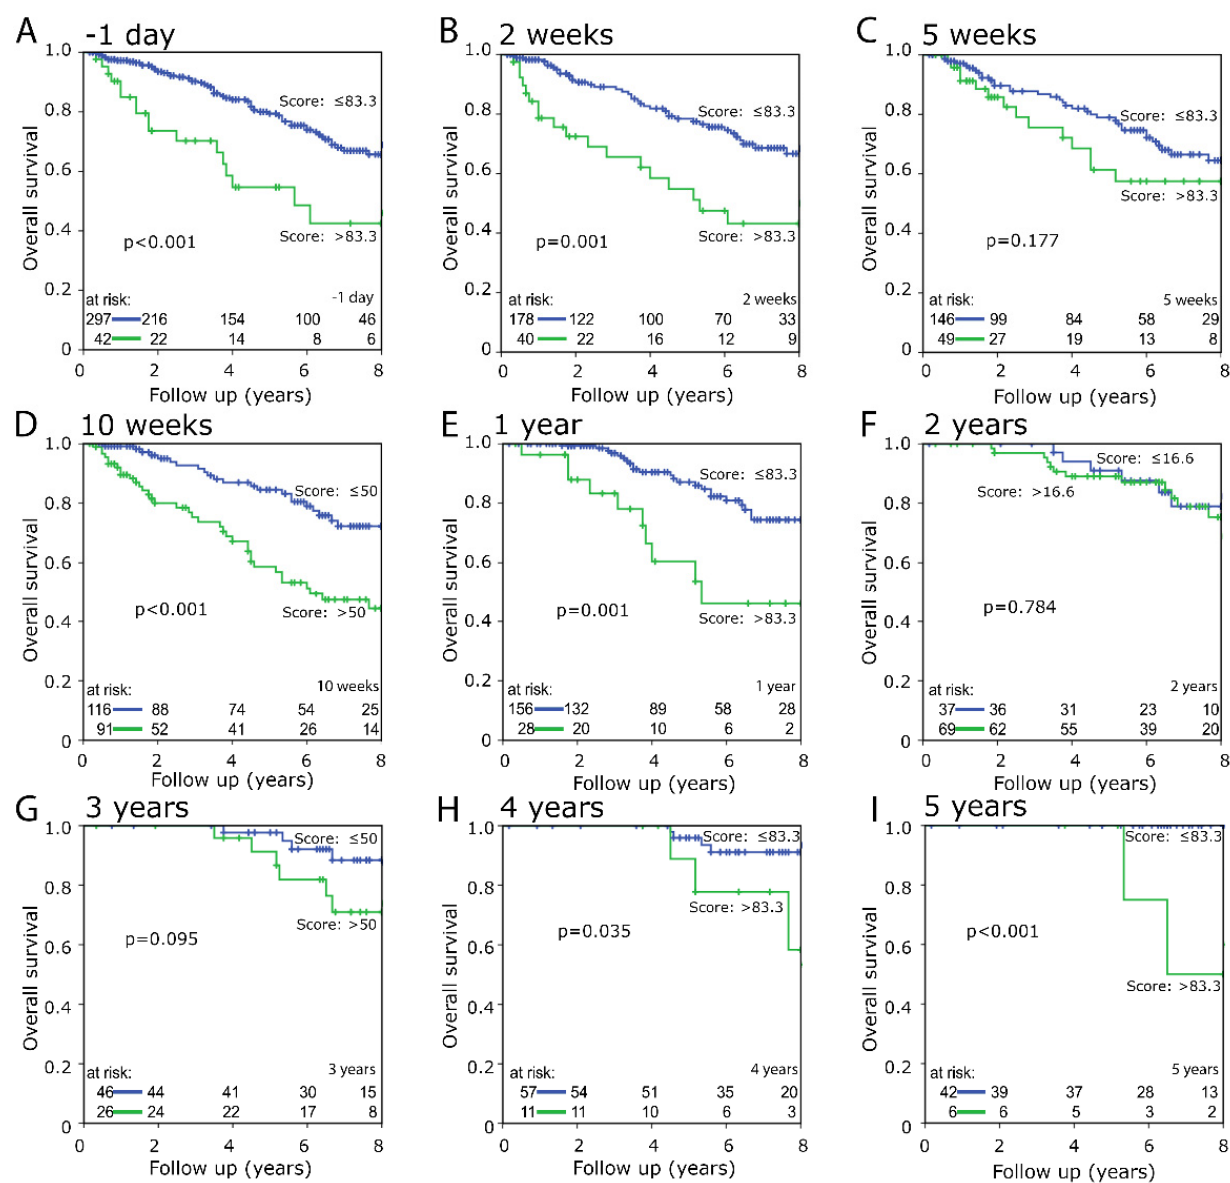

**Supplement Figure S2:** Overall survival between the group with higher (green line) and lower (blue line) scoring “long walk” with respective cutoff values at the different dates (**A:** day -1, **B:** week 2, **C:** week 5, **D:** week 10, **E:** 1 year, **F:** 2 year, **G:** 3 year, **H:** 4 year, **I:** 5 year).

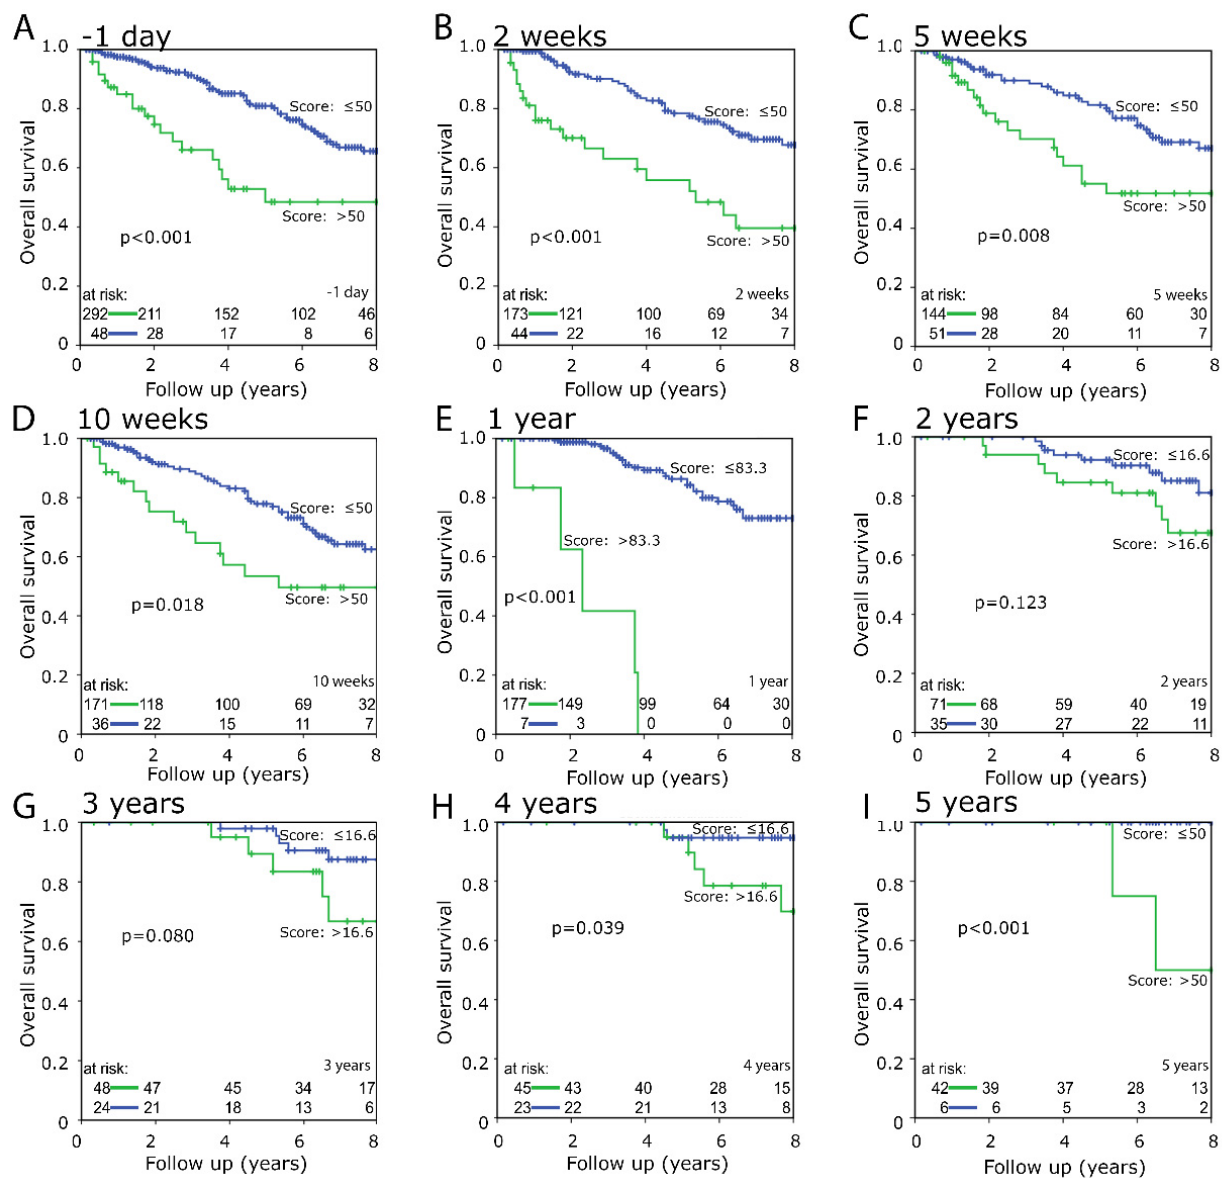

**Supplement Figure S3:** Overall survival between the group with higher (green line) and lower (blue line) scoring “short walks” with respective cutoff values at the different dates (**A**: day -1, **B**: week 2, **C**: week 5, **D**: week 10, **E**: 1 year, **F**: 2 year, **G**: 3 year, **H**: 4 year, **I**: 5 year).

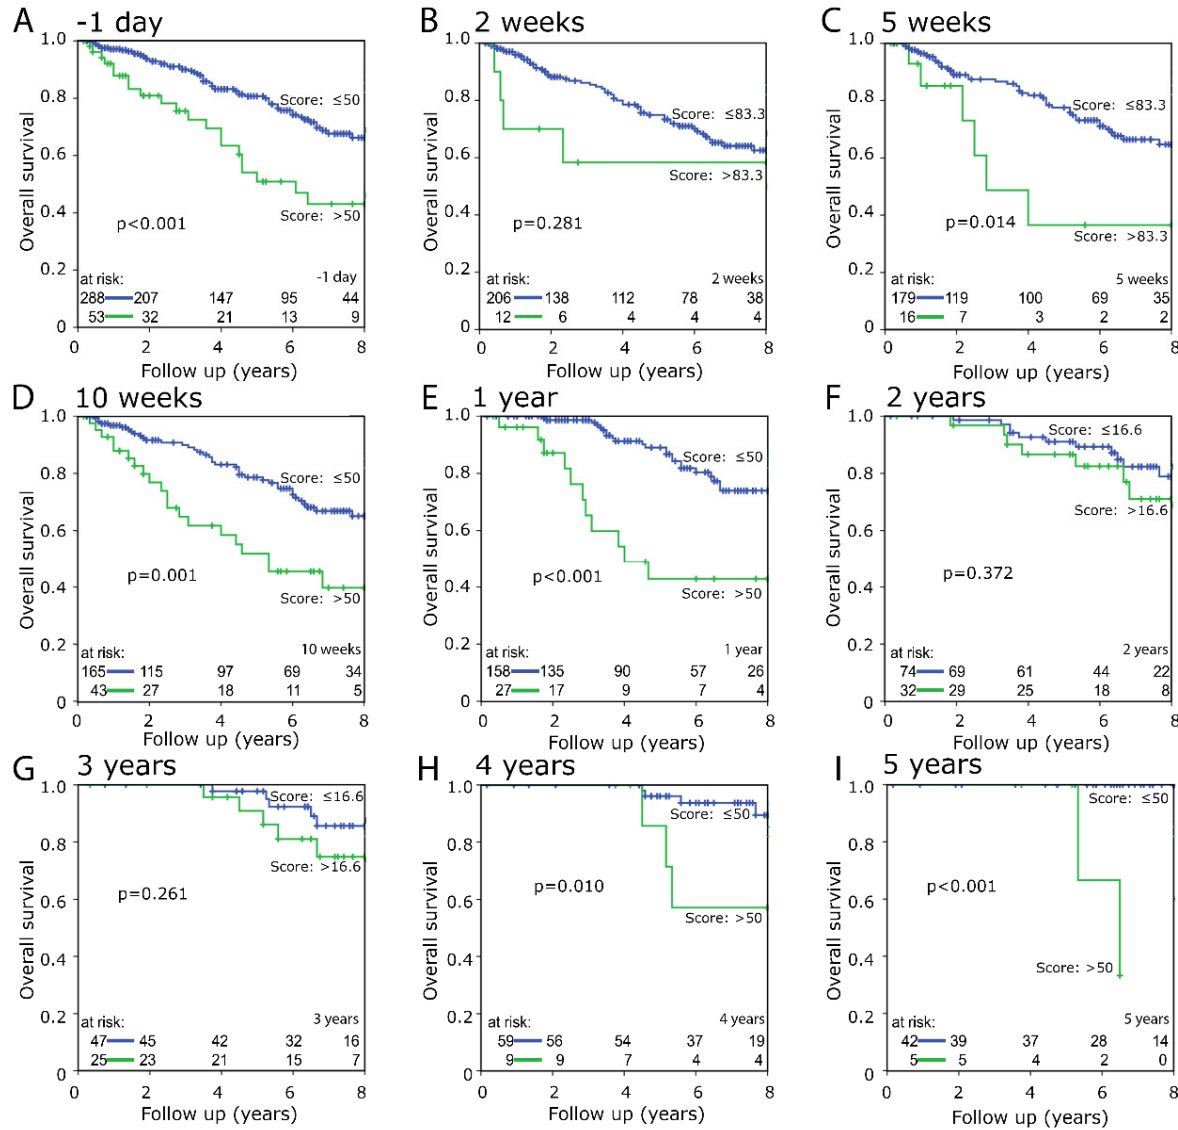

**Supplement Figure S4:** Overall survival between the group with higher (green line) and lower (blue line) scoring “bed and chair time” with respective cutoff values at the different dates (**A:** day -1, **B:** week 2, **C:** week 5, **D:** week 10, **E:** 1 year, **F:** 2 year, **G:** 3 year, **H:** 4 year, **I:** 5 year).

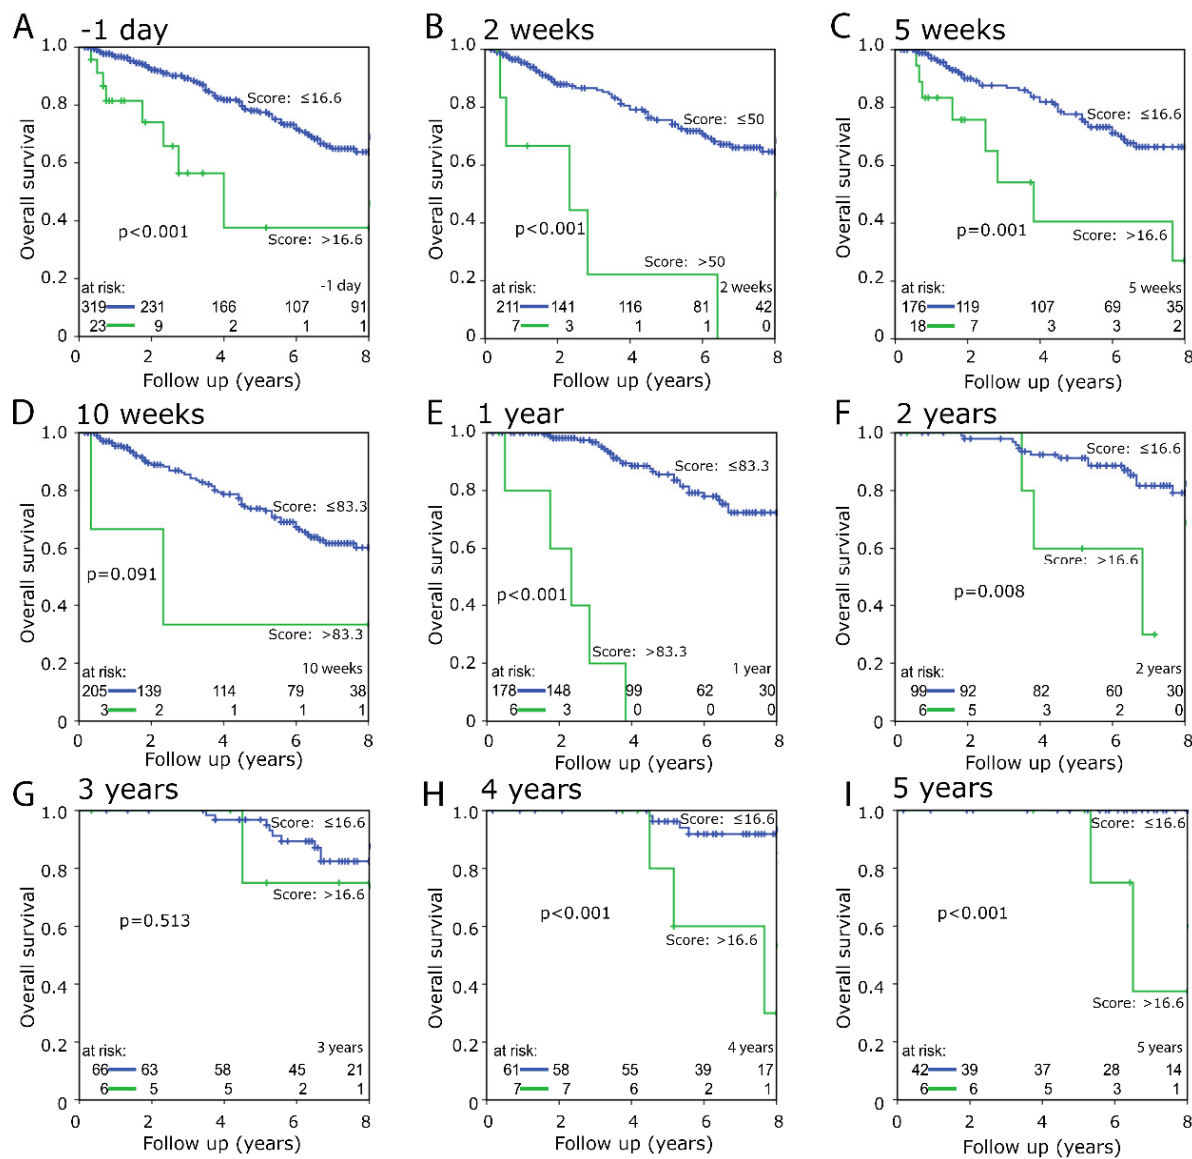

**Supplement Figure S5:** Overall survival between the group with higher (green line) and lower (blue line) scoring “daily help” with respective cutoff values at the different dates (A: day -1, B: week 2, C: week 5, D: week 10, E: 1 year, F: 2 year, G: 3 year, H: 4 year, I: 5 year).

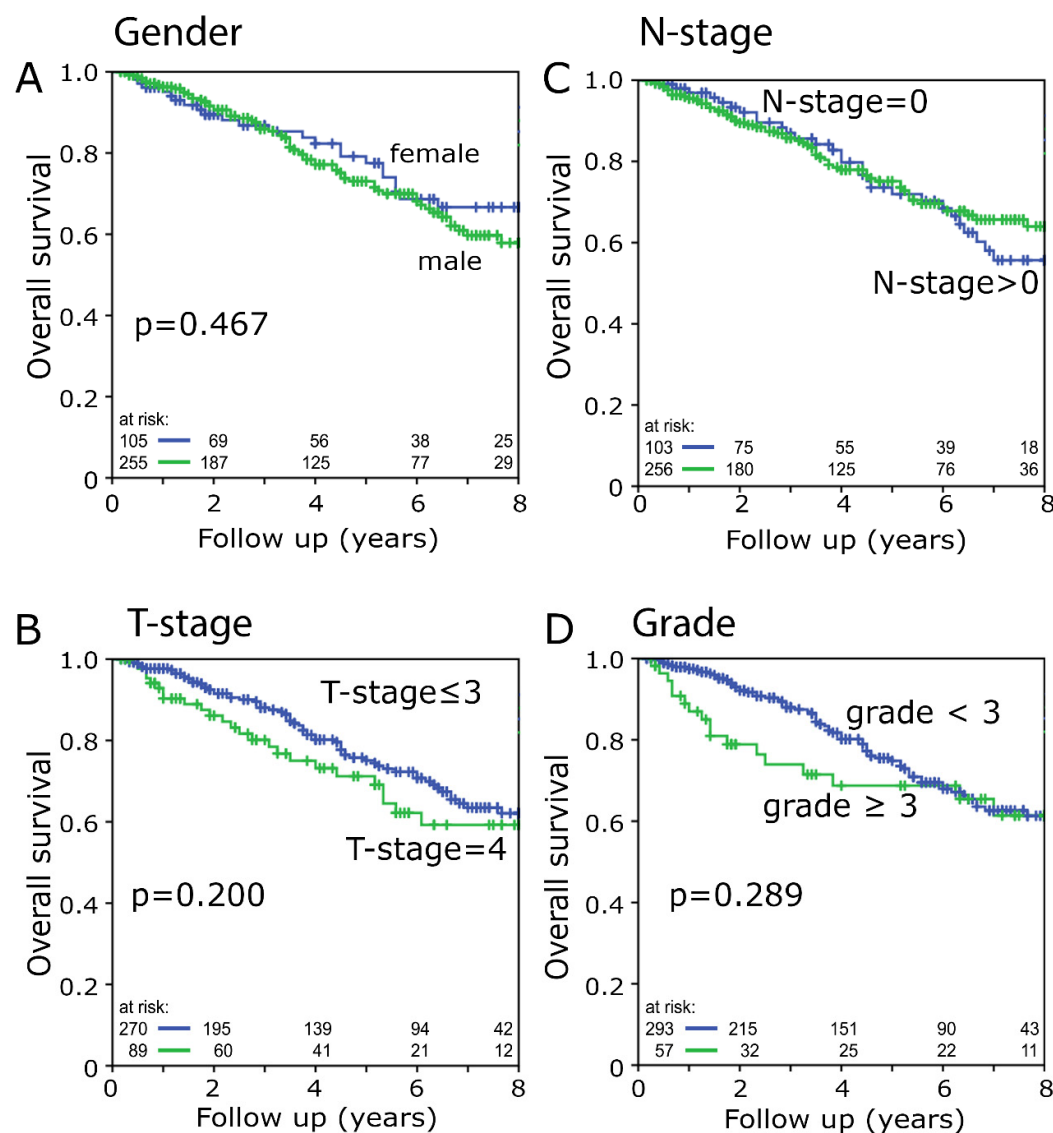

**Supplement Figure S6:** **A** Overall survival by gender, female (blue line) and male (green line); **B**: Overall survival by T stage,  $T \leq 3$  (blue line) and  $T=4$  (green line); **C**: Overall survival by nodal stage,  $N=0$  (blue line) and  $N=1/2$  (green line) **D**: Overall survival by grading,  $G<3$  (blue line) and  $G \geq 3$  (green line).

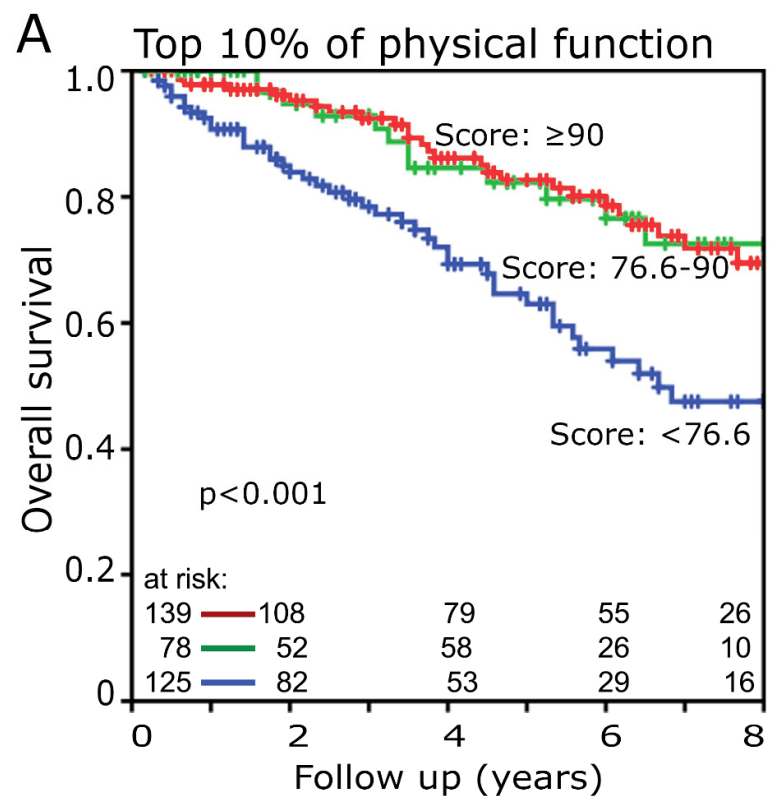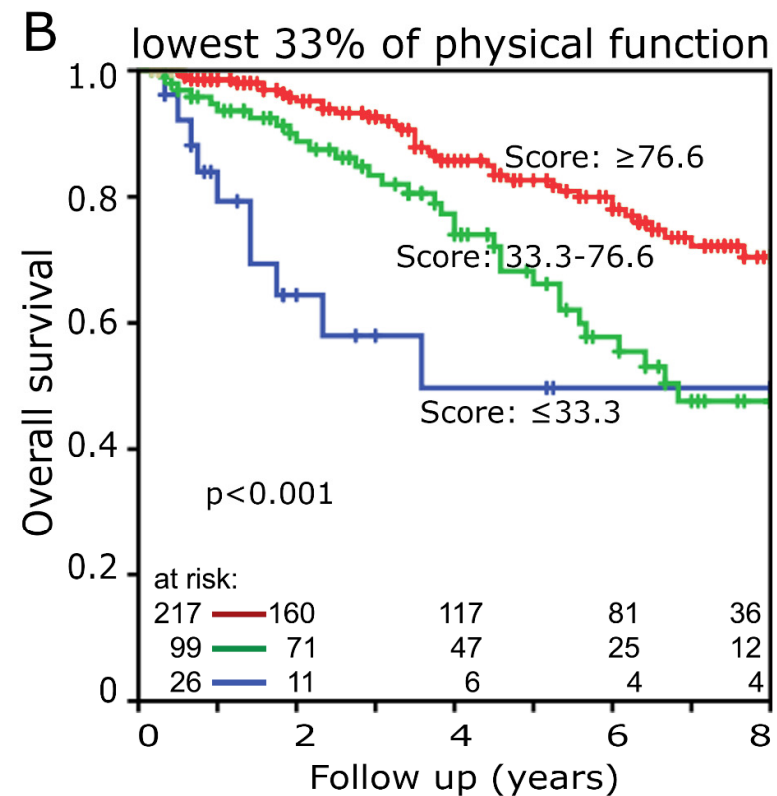

**Supplement Figure S7: A** Overall survival in 3 levels of “physical function” with a score from 90-100% (red line), 76.6-90% (green line) and below 76.6% (blue line); **B** Overall survival in 3 levels of “physical function” with a score of 76.6% and higher (red line), 33.3-76.6% (green line) and 33.3% and below (blue line).

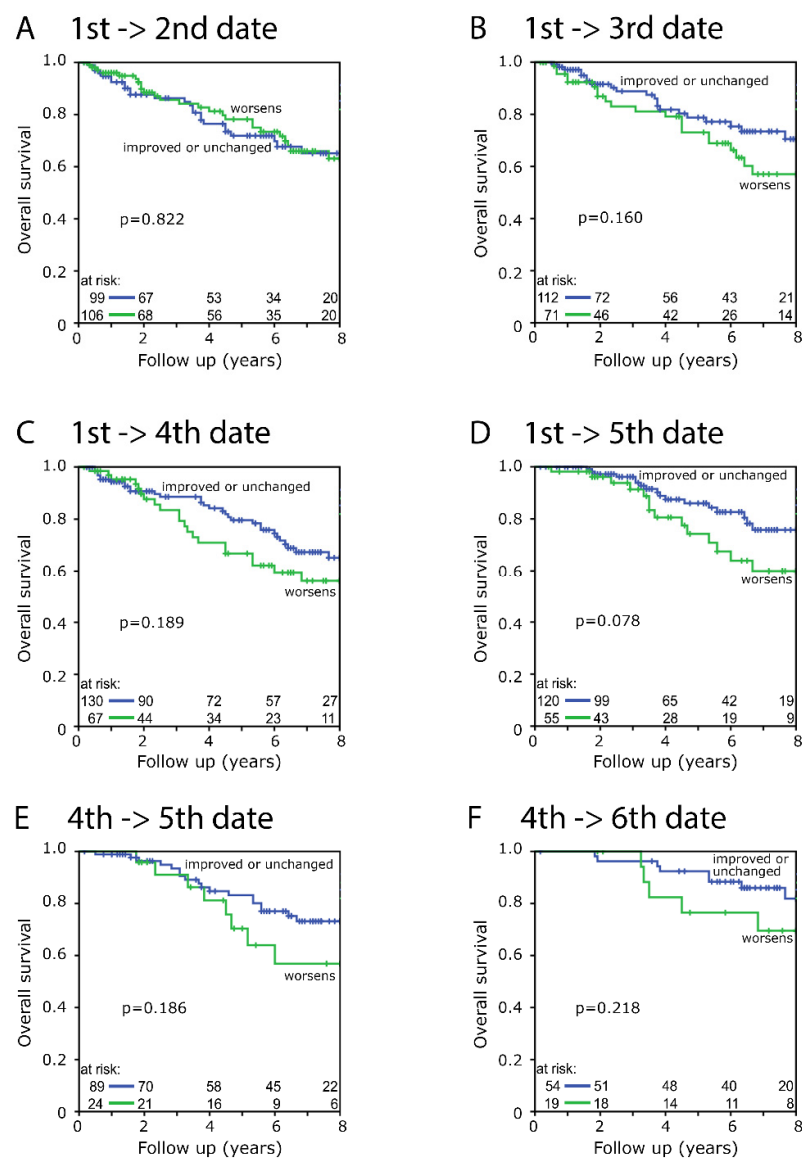

**Supplement Figure S8:** Overall survival by “physical function” score changes between various dates (**A** 1<sup>st</sup> to 2<sup>nd</sup>; **B** 1<sup>st</sup> to 3<sup>rd</sup>; **C** 1<sup>st</sup> to 4<sup>th</sup>; **D** 1<sup>st</sup> to 5<sup>th</sup>; **E** 4<sup>th</sup> to 5<sup>th</sup> and **F** 4<sup>th</sup> to 6<sup>th</sup> date).
